# Supplementary material for: Magneto-separation of genomic deoxyribose nucleic acid using pH responsive Fe3O4@silica@chitosan nanoparticles in biological samples
Source: Royal Society of Chemistry journal article supplement (doi:10.1039/c4ra15806g), 2014-12-23

### Supplementary No. 1

DNA band was excised from Agarose gel electrophoresis by using equal volumes of TE buffer (pH 8.0). GCE electrode were coated with isolated DNA samples and dried at 4 °C for overnight. The SWV analysis of GCE modified with isolated DNA were carried out for quantitative analysis.

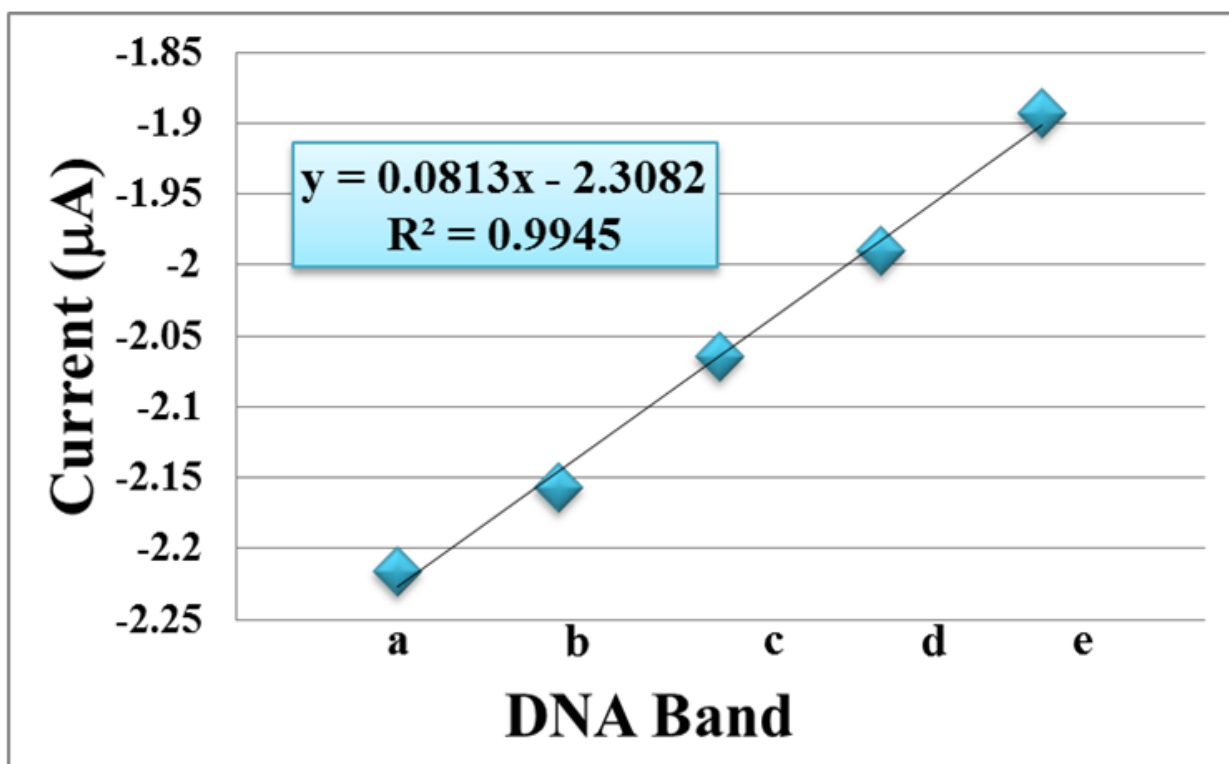

Supplement: c4ra15806g1.pdf [file c4ra15806g1.pdf]
